# Supplementary material
Source: publisher figshare collection journal article supplement (https://frontiersin.figshare.com/ndownloader/files/26179679)
Supplement: Supplementary file 1 [file 26179679]

## Original image of the article

**Figure 2**

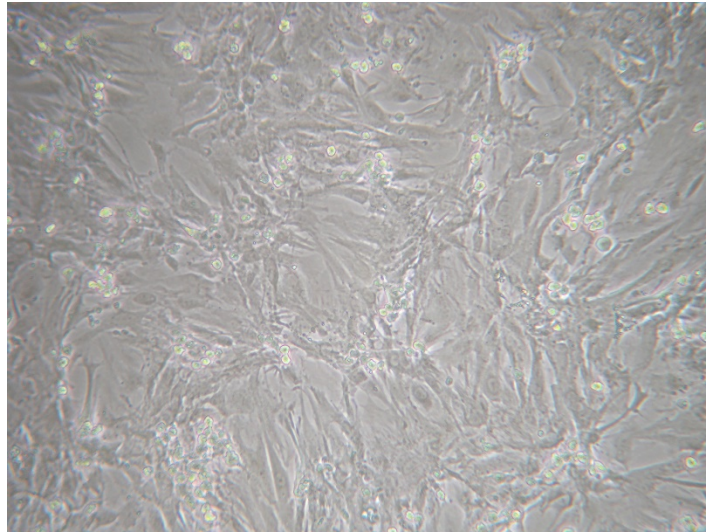

Figure 2A. The morphological changes of NMC ( Control-0h group)

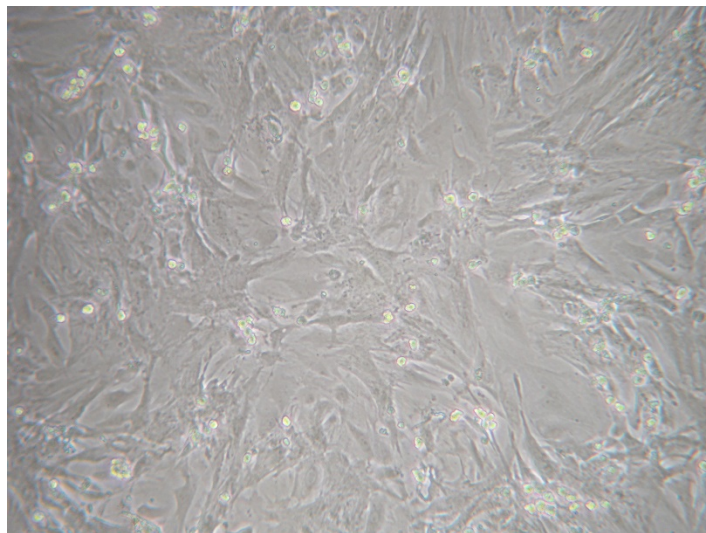

Figure 2A. The morphological changes of NMC ( Control-12h group)

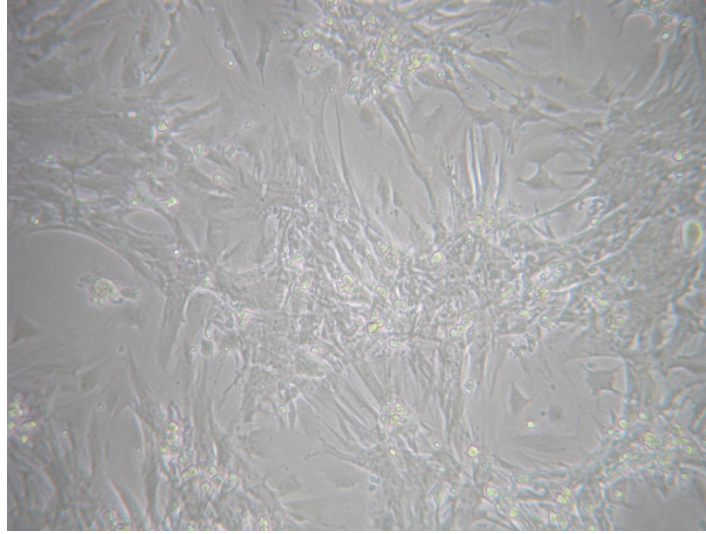

Figure 2A. The morphological changes of NMC ( Control-24h group)

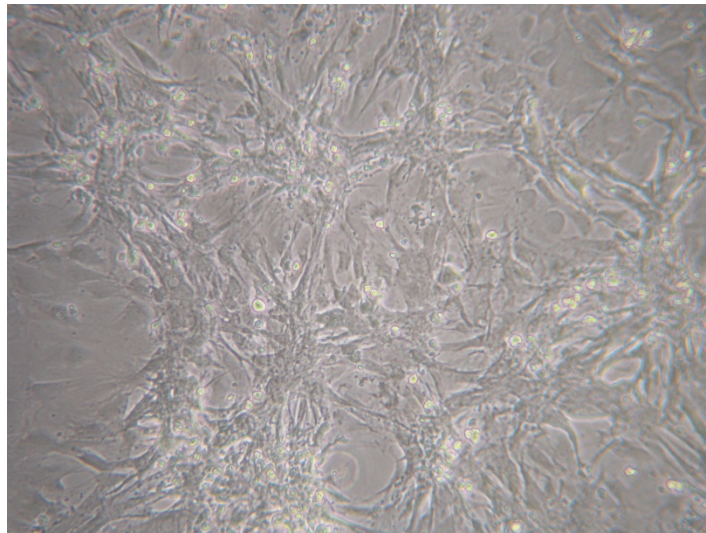

Figure 2A. The morphological changes of NMC ( Control-48h group)

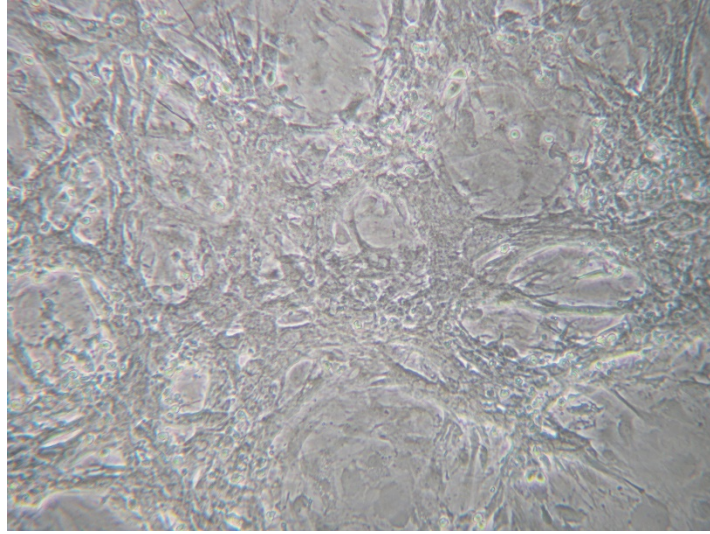

Figure 2A. The morphological changes of NMC (CVB3-0h group)

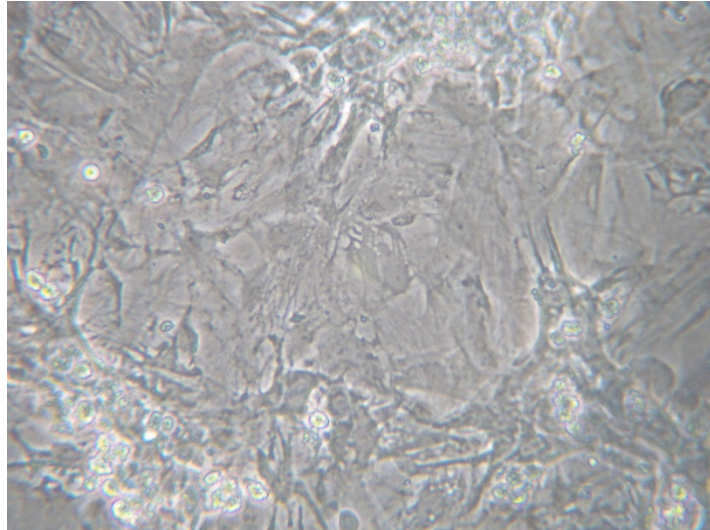

Figure 2A. The morphological changes of NMC (CVB3-12h group)



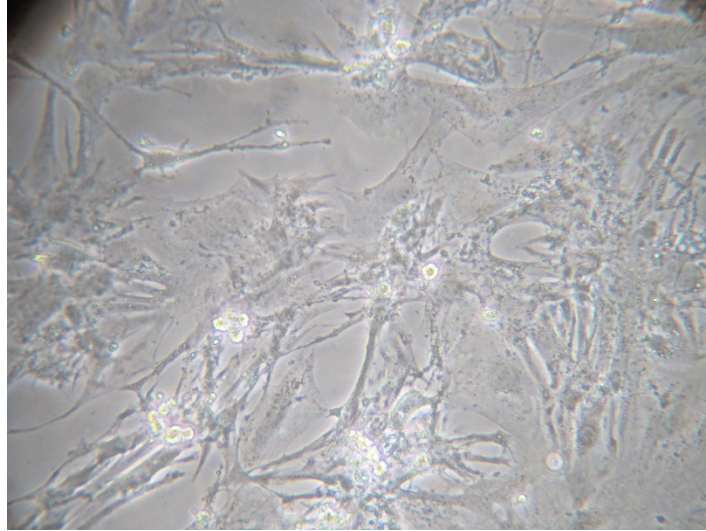

Figure 2A. The morphological changes of NMC (CVB3-24h group)

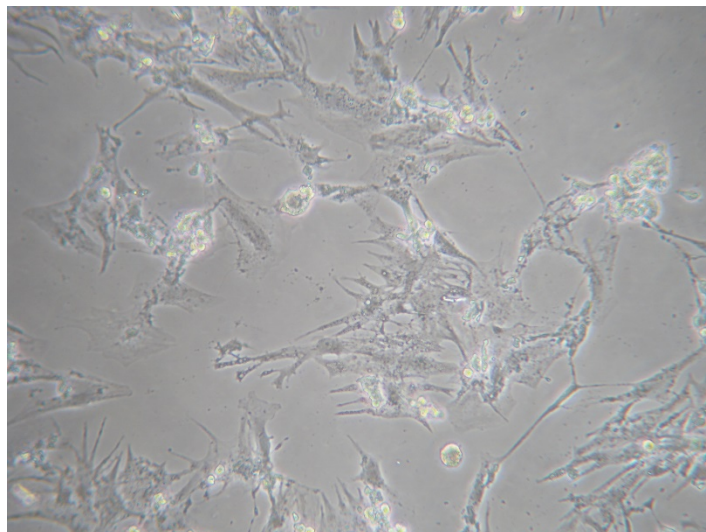

Figure 2A. The morphological changes of NMC (CVB3-48h group)

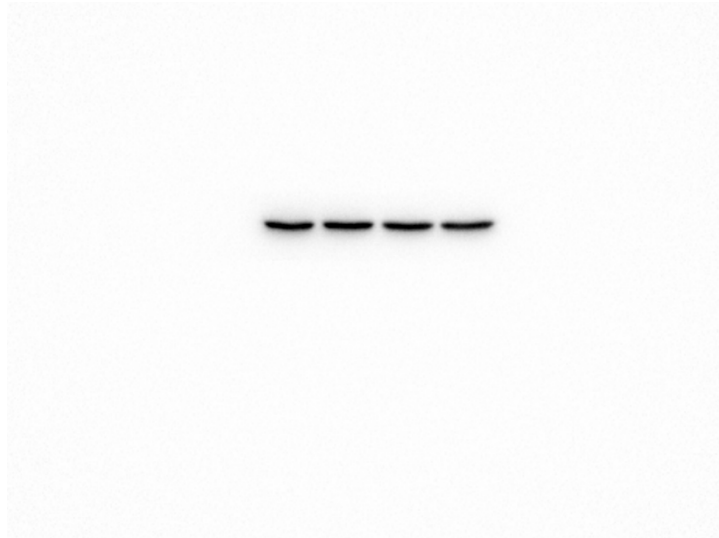

Figure 2B. GADPH protein expression

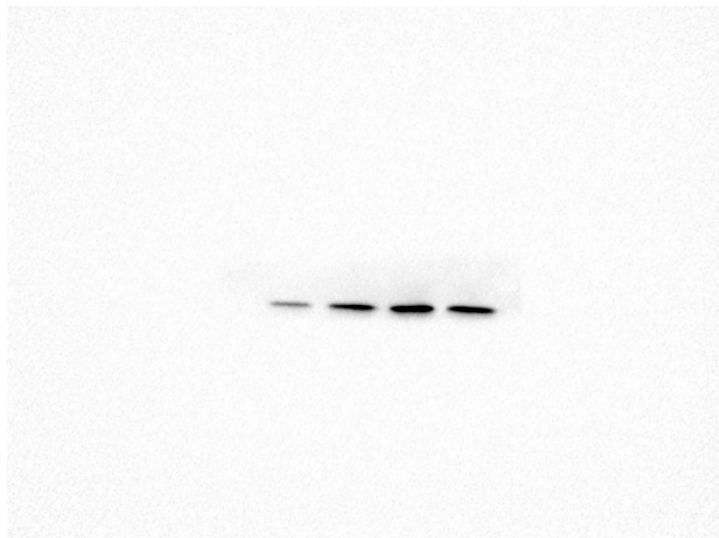

Figure 2B. survivin protein expression

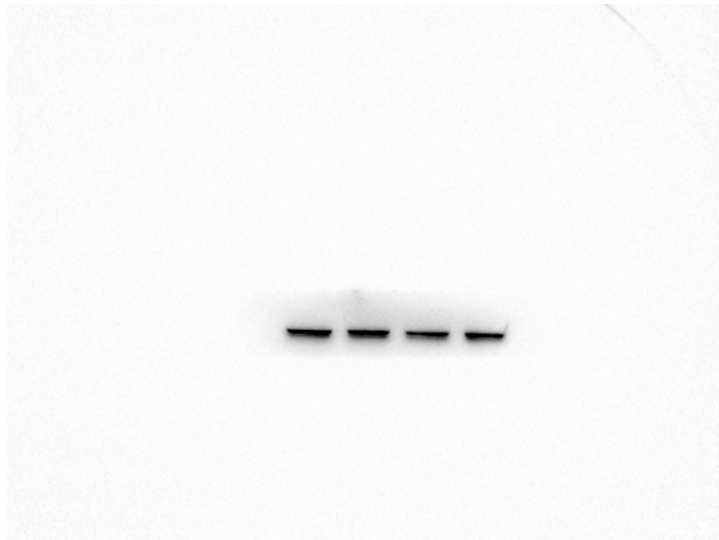

Figure 2B. STAT3 protein expression

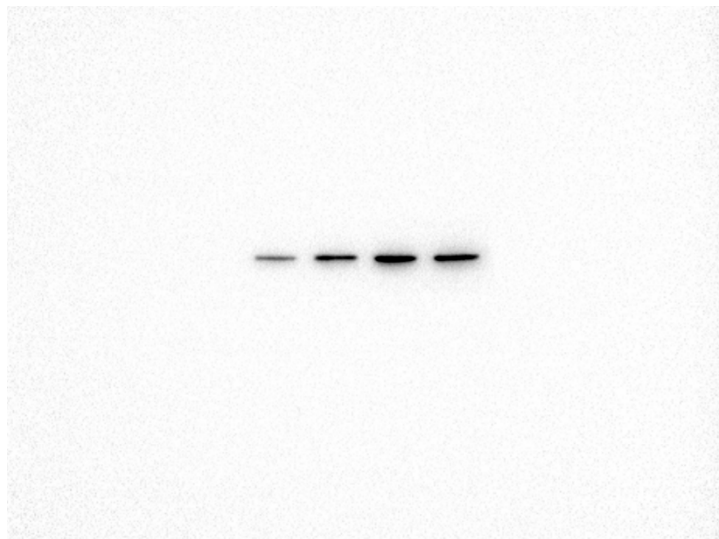

Figure 2B. p-STAT3 protein expression
